# Supplementary figures and images for: Brain and Hepatic Glucose Utilization in Malarial Infection Does Not Depend on Cerebral Symptoms of the Disease
Source: Hindawi journal article supplement (doi:10.1155/2019/3542393), 2019-12-19

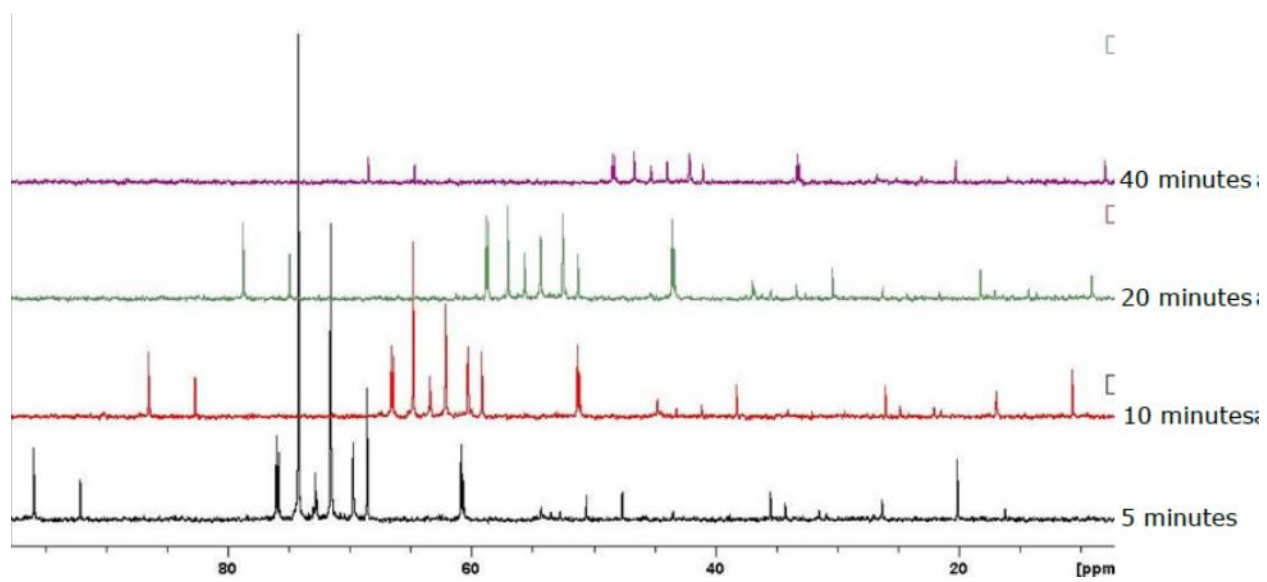

Supplementary 1

Supplement: f1 [file 3542393.f1.pdf]
